# Supplementary material for: Serum anti-Spike antibody titers before and after heterologous booster with mRNA-1273 SARS-CoV-2 vaccine following two doses of inactivated whole-virus CoronaVac vaccine
Source: bioRxiv or medRxiv preprint supplement (doi:10.1101/2021.12.24.21268360), 2021-12-24
Supplement: Supplementary file [file media-1.pdf]

Figure S1. Scatter plot of anti-Spike IgG titers before mRNA-1273 booster and time since second vaccination

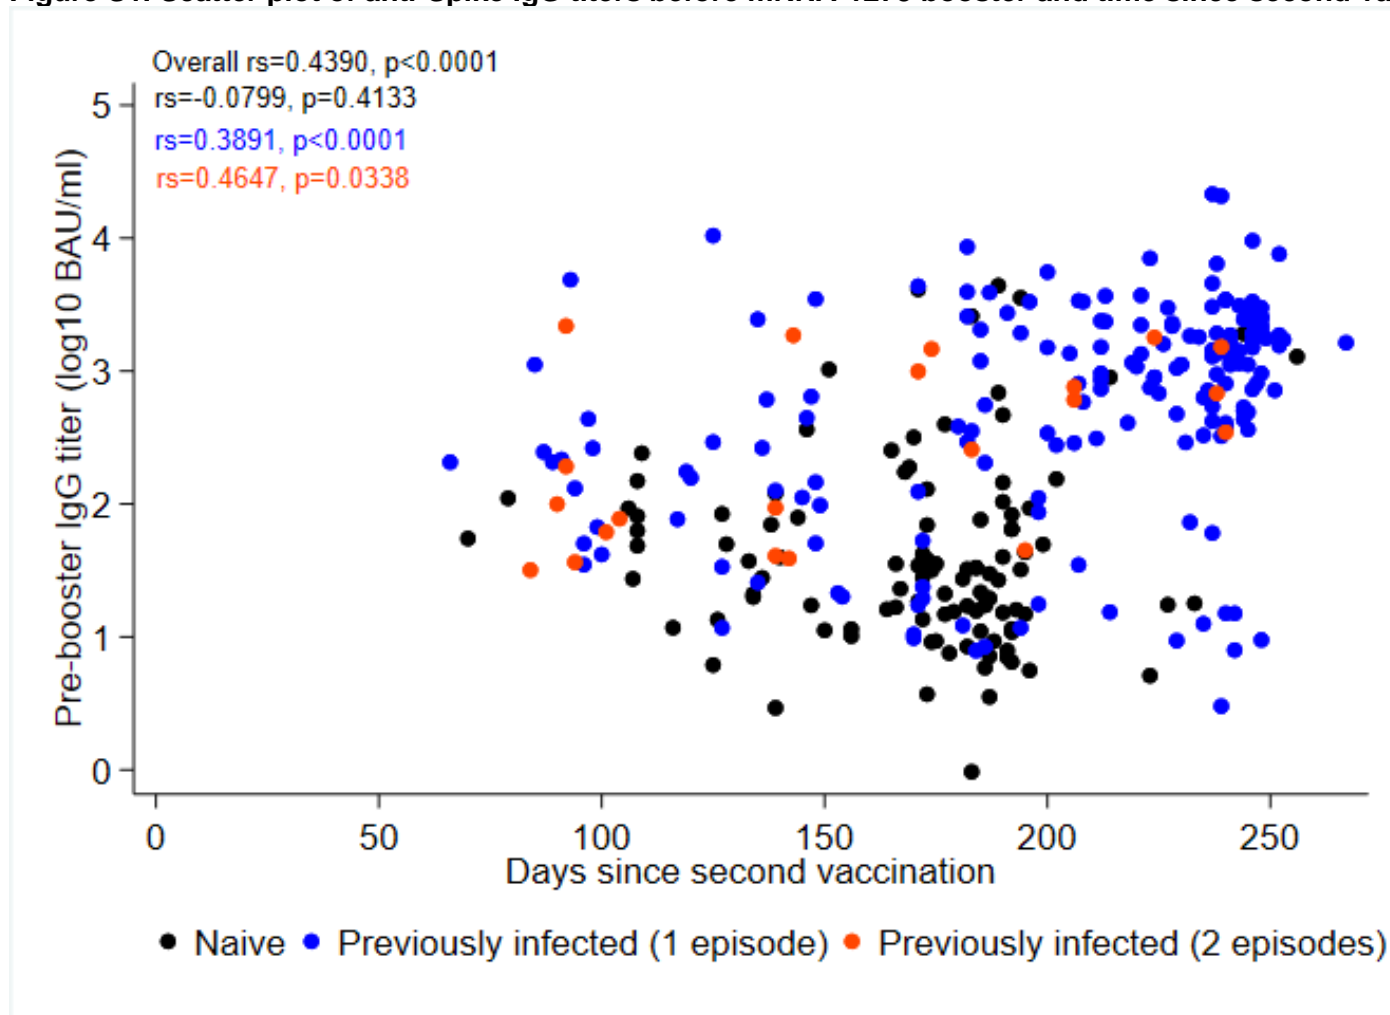

Pre-boost IgG titers correlated positively with the time since the second CoronaVac vaccine dose in previously infected participants (either one or two episodes), but did not correlate in naïve participants.

Figure S2. Scatter plot of anti-Spike IgG titers before and after mRNA-1273 booster

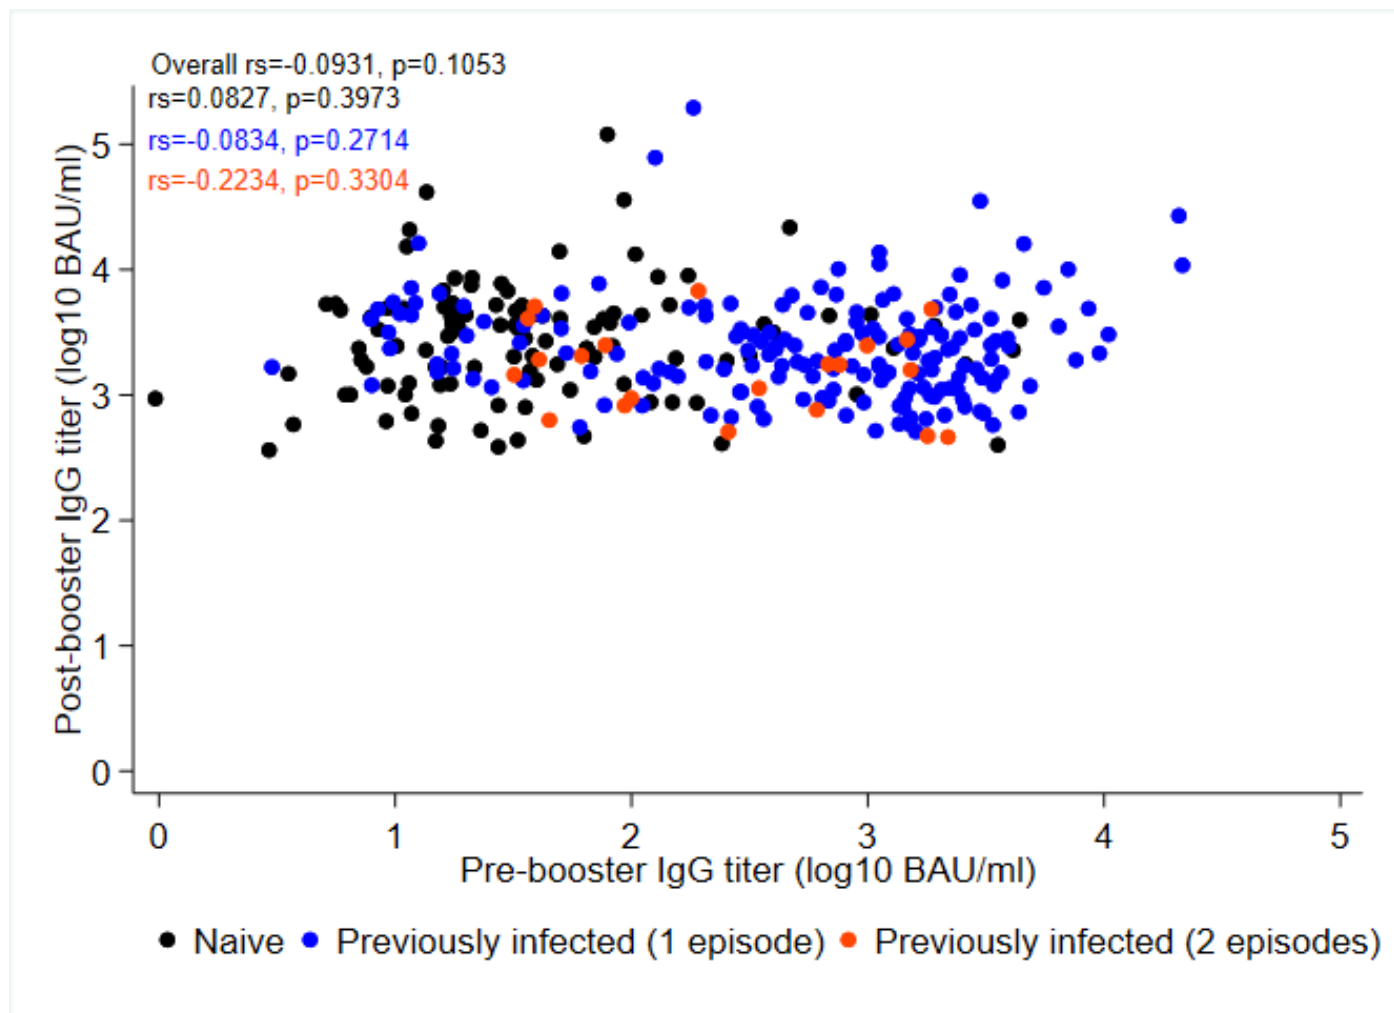

All participants reached a substantial post-boost titer, ranging between 2570 and 1,380,384 BAU/mL (2.73 log<sub>10</sub> range), and this was irrespective of the pre-boost IgG titer or previous infection.

Figure S3. Anti-Spike IgG titers before and after mRNA-1273 booster

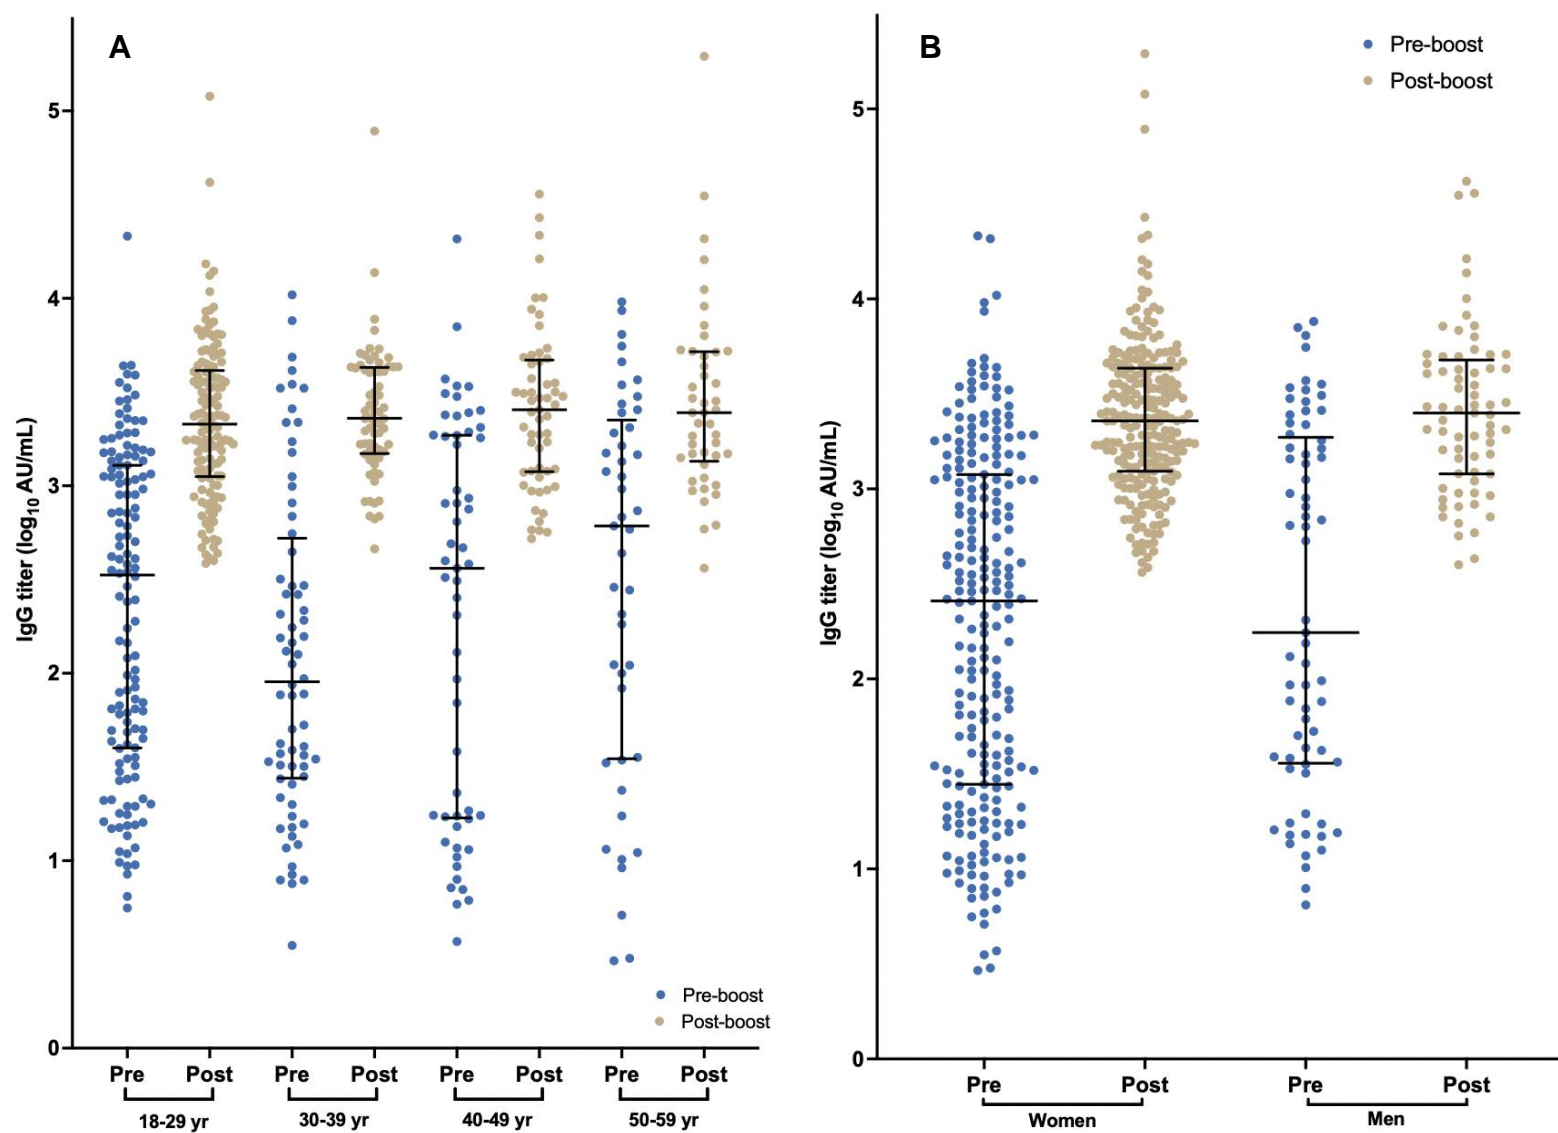

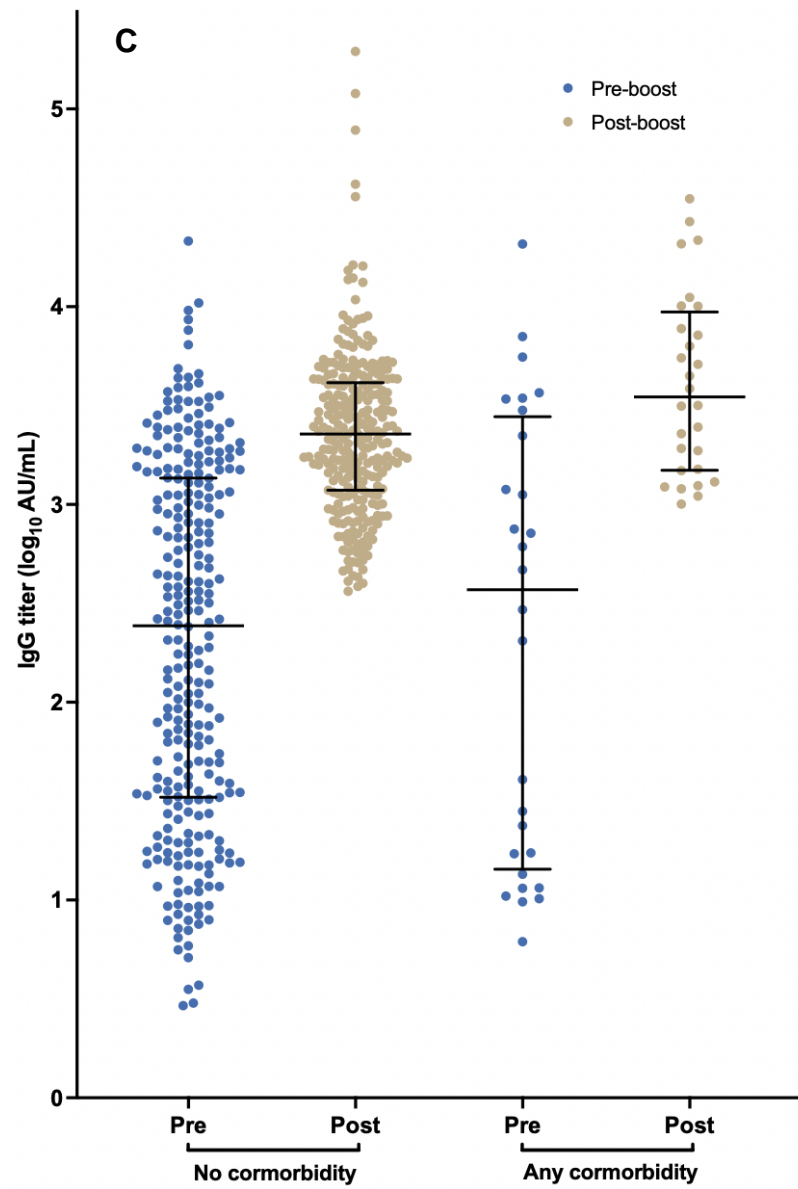

Panels (A-C) show dot plots of pre and post-booster IgG titers, by (A) age groups, (B) sex, (C) comorbidity.

IgG titers shown as binding antibody units (BAU)/mL (according to WHO International Standard).

**Figure S3. Change in anti-Spike IgG titers between before and after mRNA-1273 booster**

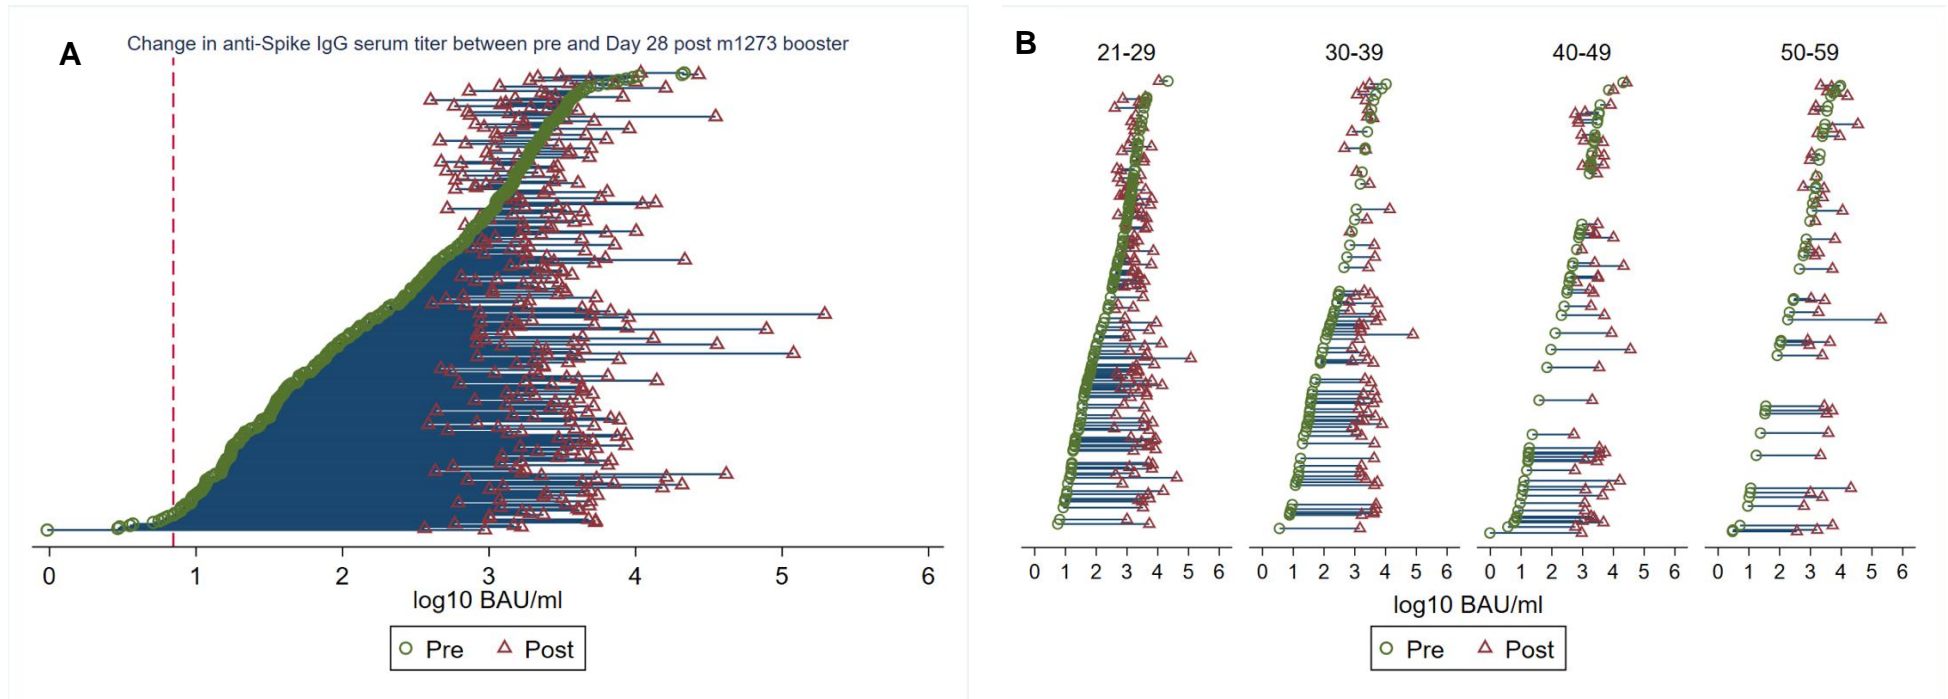

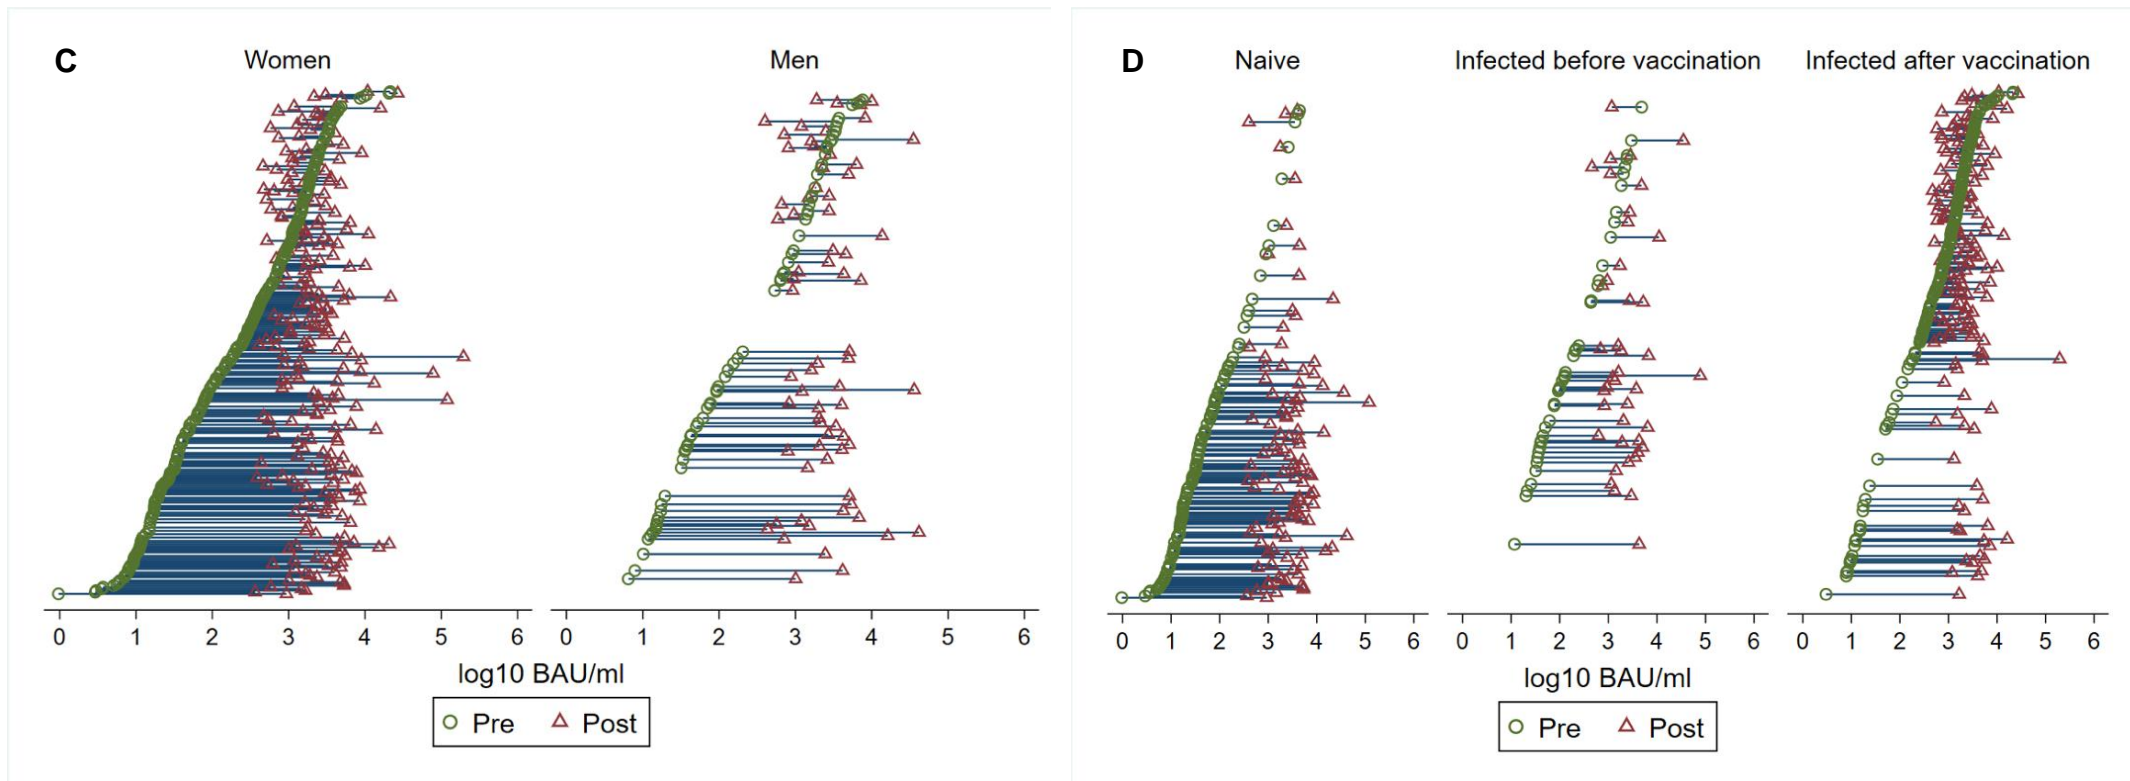

Panels (A-D) show the change in anti-Spike serum titer between pre and Day 28 post mRNA-1273 booster, (A) overall and by (B) age groups, (C) sex, (D) previous SARS-CoV-2 infection before or after CoronaVac. Participants (N=304) are ranked by pre-booster IgG titer. Dashed red line (A) represents cut-off of seropositivity ( $\geq 7.1$  BAU/mL).

**Table S1. Anti-Spike IgG titers before and Day 28 after mRNA-1273 booster**

|                                                         | <b>Median pre-booster (IQR)</b> | <b>Median post-booster (IQR)</b> | <b>Fold change</b> | <b>p-value</b> |
|---------------------------------------------------------|---------------------------------|----------------------------------|--------------------|----------------|
| Overall                                                 | 249.8 (31.9-1389.2)             | 2312.8 (1225.8-4324.3)           | 9.3                | <0.0001        |
| Age                                                     |                                 |                                  |                    |                |
| 21-29                                                   | 334.9 (39.9-1285.1)             | 2132.8 (1128.2-4066.2)           | 6.4                | <0.0001        |
| 30-39                                                   | 90.2 (27.7-500.4)               | 2292.2 (1500.2-4271.4)           | 25.0               | <0.0001        |
| 40-49                                                   | 363.1 (17.1-1856.7)             | 2543.9 (1197.1-4594.4)           | 7.0                | <0.0001        |
| 50-59                                                   | 611.0 (35.5-2048.7)             | 2455.2 (1410.2-5177.3)           | 2.8                | 0.0001         |
| Sex                                                     |                                 |                                  |                    |                |
| Women                                                   | 257.1 (27.9-1191.1)             | 2278.4 (1238.2-4315.4)           | 8.9                | <0.0001        |
| Men                                                     | 175.2 (36.4-1804.3)             | 2510.6 (1202.7-4570.3)           | 14.3               | <0.0001        |
| Previous SARS-CoV2 infection                            |                                 |                                  |                    |                |
| 0                                                       | 31.8 (14.8-84.3)                | 2833.6 (1227.6-4686.7)           | 89.1               | <0.0001        |
| 1                                                       | 808.5 (193.5-2049.1)            | 2163.0 (1301.4-4033.3)           | 2.7                | <0.0001        |
| 2                                                       | 257.1 (61.5-994.1)              | 1741.6 (823.6-2492.8)            | 6.8                | 0.0010         |
| Previous SARS-CoV-2 infection timing                    |                                 |                                  |                    |                |
| None                                                    | 31.8 (14.8-84.3)                | 2833.6 (1227.6-4686.7)           | 89.1               | <0.0001        |
| Before CoronaVac                                        | 124.9 (41.7-760.3)              | 1985.5 (1153.0-4077.5)           | 15.9               | <0.0001        |
| After CoronaVac                                         | 962.6 (292.0-2115.5)            | 2136.4 (1299.3-3854.6)           | 2.2                | <0.0001        |
| Time interval between second dose and mRNA-1273 booster |                                 |                                  |                    |                |
| 1                                                       | 80.1 (34.3-211.6)               | 2369.6 (1202.0-4324.3)           | 24.6               | <0.0001        |
| 2                                                       | 33.0 (15.5-294.0)               | 2943.0 (1482.5-4686.7)           | 94.6               | <0.0001        |
| 3                                                       | 709.4 (49.6-1596.1)             | 2522.3 (1303.6-5305.1)           | 3.4                | <0.0001        |
| 4                                                       | 1439.5 (533.8-2226.6)           | 1714.7 (1132.5-2764.0)           | 1.2                | 0.0037         |
| Comorbidity                                             |                                 |                                  |                    |                |
| 0                                                       | 243.9 (33.1-1359.9)             | 2269.9 (1180.7-4115.5)           | 9.3                | <0.0001        |
| ≥1                                                      | 380.9 (15.3-2608.7)             | 3510.3 (1494.9-8898.8)           | 9.2                | <0.0001        |

Data are expressed as binding antibody units (BAU)/mL (according to WHO International Standard)

**Table S2.** Adverse reactions within seven days after receiving the mRNA-1273 booster dose

|                       | <b>N (%)</b> | <b>Grade 1</b> | <b>Grade 2</b> | <b>Grade 3</b> | <b>Grade 4</b> | <b>Unknown</b> |
|-----------------------|--------------|----------------|----------------|----------------|----------------|----------------|
| Any adverse reactions | 300 (98.68)  | 86 (28.29)     | 131 (43.09)    | 59 (19.41)     | 24 (7.89)      | 0 (0.00)       |
| Any local reaction    | 293 (96.38)  | 103 (33.88)    | 134 (44.08)    | 43 (14.14)     | 13 (4.28)      | 0 (0.00)       |
| Pain                  | 290 (95.39)  | 107 (35.20)    | 126 (41.45)    | 43 (14.14)     | 13 (4.28)      | 1 (0.33)       |
| Swelling              | 183 (60.20)  | 113 (37.17)    | 52 (17.11)     | 17 (5.59)      | 0 (0.00)       | 1 (0.33)       |
| Redness               | 110 (36.18)  | 74 (24.34)     | 32 (10.53)     | 4 (1.32)       | 0 (0.00)       | 0 (0.00)       |
| Any systemic reaction | 276 (90.79)  | 120 (39.47)    | 87 (28.62)     | 49 (16.12)     | 19 (6.25)      | 1 (0.33)       |
| Myalgia               | 192 (63.16)  | 93 (30.59)     | 61 (20.07)     | 31 (10.20)     | 7 (2.30)       | 0 (0.00)       |
| Fever/chills          | 189 (62.17)  | 110 (36.18)    | 44 (14.47)     | 20 (6.58)      | 7 (2.30)       | 6 (1.97)       |
| Headache              | 184 (60.53)  | 95 (31.25)     | 45 (14.80)     | 38 (12.50)     | 4 (1.32)       | 0 (0.00)       |
| Fatigue               | 168 (55.26)  | 87 (28.62)     | 52 (17.11)     | 24 (7.89)      | 4 (1.32)       | 1 (0.33)       |
| Arthralgia            | 143 (47.04)  | 61 (20.07)     | 46 (15.13)     | 31 (10.20)     | 5 (1.64)       | 0 (0.00)       |
| Nausea                | 95 (31.25)   | 57 (18.75)     | 25 (8.22)      | 8 (2.63)       | 3 (0.99)       | 0 (0.00)       |
| Anaphylaxis           | 0 (0.0)      | 0 (0.00)       | 0 (0.00)       | 0 (0.00)       | 0 (0.00)       | 0 (0.00)       |

The table shows solicited adverse reactions, that were verified and graded for severity by the study physician. Severity grading: 1) mild (does not or minimally interfere with usual social and functional activities); 2) moderate (interferes with usual social and functional activities); 3) severe (causing inability to perform usual social and functional activities); 4) disrupting/impairing activities of daily living (ADL). No participants required hospitalization or died.



**Table S3. Regression analysis of occurrence of severe or disrupting adverse reactions.**

|                                                                                    | Univariable |                  |                   | Multivariable |                  |              |
|------------------------------------------------------------------------------------|-------------|------------------|-------------------|---------------|------------------|--------------|
|                                                                                    | OR          | 95%CI            | P                 | OR            | 95%CI            | P            |
| Age, per decade increase                                                           | 0.69        | 0.53-0.90        | 0.006             | <b>0.71</b>   | <b>0.54-0.92</b> | <b>0.011</b> |
| Sex                                                                                |             |                  |                   |               |                  |              |
| Men                                                                                | 1 (ref)     |                  |                   | 1 (ref)       |                  |              |
| Women                                                                              | 1.63        | 0.85-3.130       | 0.139             | 1.60          | 0.81-3.17        | 0.174        |
| Comorbidities                                                                      |             |                  |                   |               |                  |              |
| No                                                                                 | 1 (ref)     |                  |                   | -             | -                | -            |
| Yes                                                                                | 0.88        | 0.36-2.15        | 0.774             | -             | -                | -            |
| Past COVID-19                                                                      |             |                  |                   |               |                  |              |
| No                                                                                 | 1 (ref)     |                  |                   | 1 (ref)       |                  |              |
| Yes                                                                                | 1.73        | 0.99-3.03        | 0.053             | 1.20          | 0.59-2.44        | 0.619        |
| Pre-booster IgG                                                                    | 1.43        | 1.08-1.89        | 0.013             | 0.73          | 0.33-1.61        | 0.431        |
| Post-booster IgG                                                                   | 0.58        | 0.31-1.10        | 0.095             | -             | -                | -            |
| Change in IgG titers between before and after mRNA-1273 boost                      | 0.69        | 0.53-0.89        | 0.004             | 0.65          | 0.33-1.30        | 0.225        |
| Interval between first and second vaccination, per day increase                    | 0.97        | 0.93-1.00        | 0.059             | 0.99          | 0.96-1.02        | 0.484        |
| Interval between second vaccination and mRNA-1273 booster dose, per month increase | <b>1.51</b> | <b>1.25-1.83</b> | <b>&lt;0.0001</b> | <b>1.37</b>   | <b>1.09-1.72</b> | <b>0.007</b> |

Table shows univariable and multivariable logistic regression with occurrence of any severe or ADL-disrupting adverse reaction as the dependent variable.

Severe or disrupting adverse reactions were defined as causing inability to perform usual social and functional activities or disrupting/impairing activities of daily living (ADL), respectively.

Interval between first and second dose, post-booster IgG titer, and presence of any comorbidity were not associated with the occurrence of severe or disrupting adverse reaction.
